# Supplementary material for: HS1BP3 negatively regulates autophagy by modulation of phosphatidic acid levels
Source: PubMed Central journal article supplement (PMC5412012; doi:10.1038/ncomms13889), 2016-12-22
Supplement: ncomms13889-s1.pdf [file ncomms13889-s1.pdf]

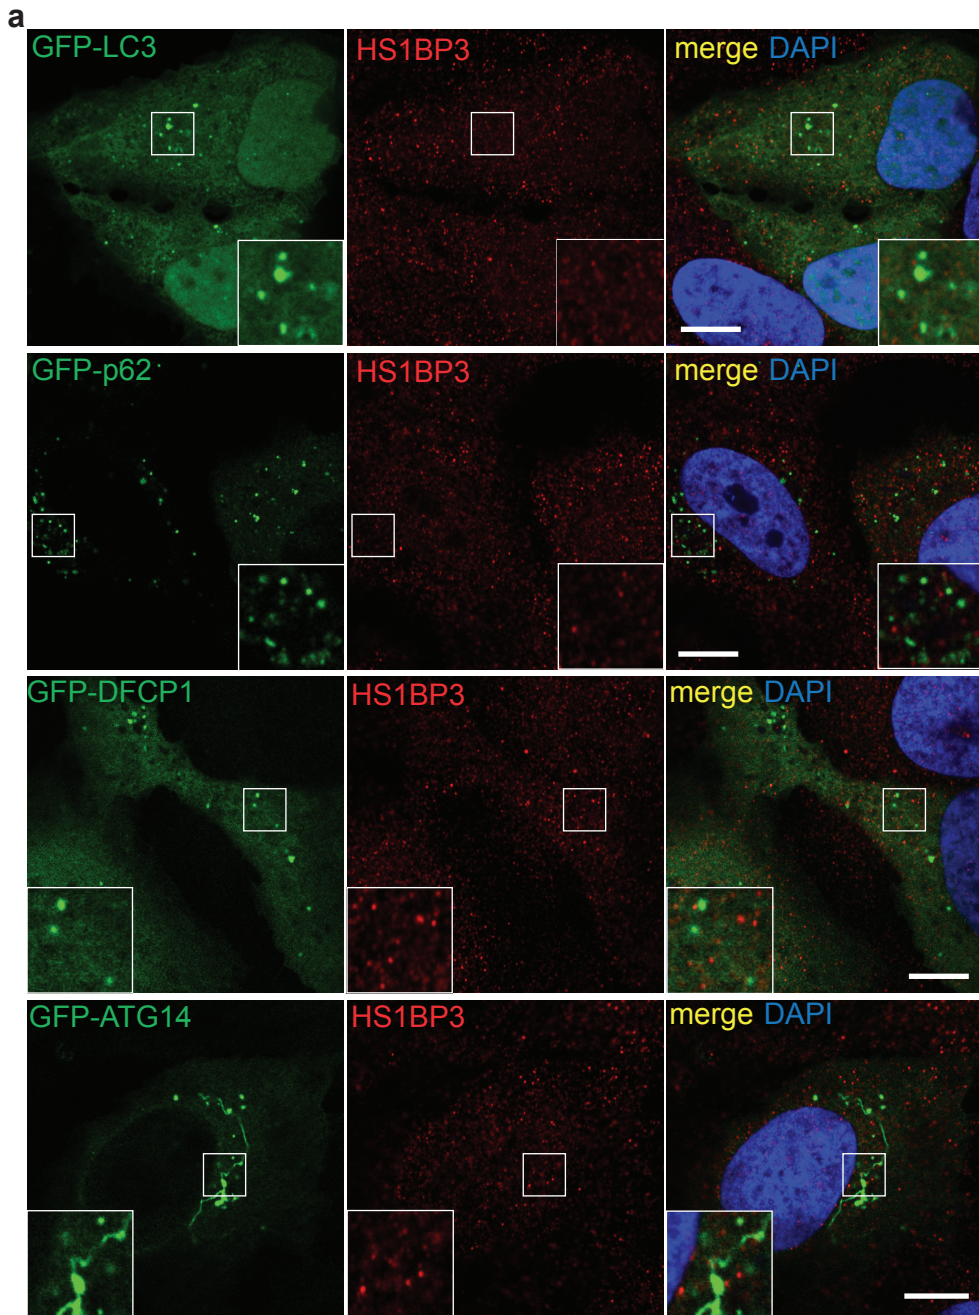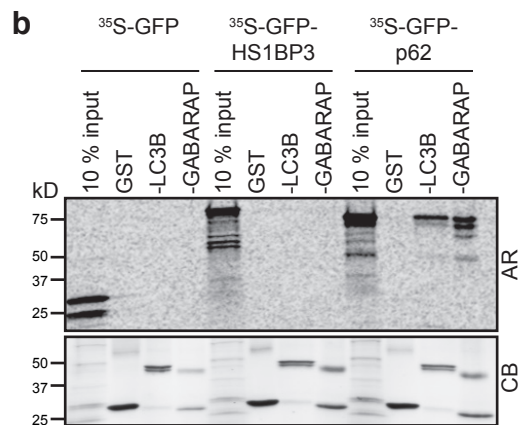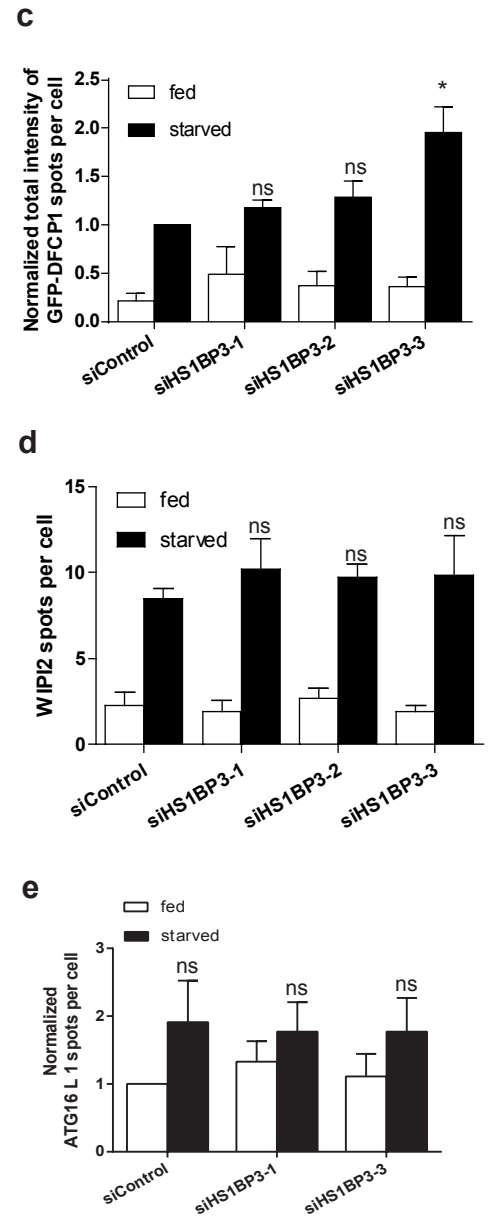

**Supplementary Figure 2: Localization of endogenous HS1BP3 and its effects on early phagophore markers.**

(a) HEK cells were transfected with the indicated GFP-tagged autophagy markers, starved, fixed and co-stained for endogenous HS1BP3. Scale bars 10  $\mu$ m. (b) In vitro translated GFP, GFP-HS1BP3 or GFP-p62 was incubated with recombinant GST-tagged LC3B or GABARAP. Following GST pulldown, bound proteins were detected by autoradiography (AR) and GST proteins by Coomassie blue staining (CB). (c) HEK GFP-DFCP1 cells were transfected with siRNA against HS1BP3 and starved or not for 50 min before fixation and imaging. The total intensity of GFP-DFCP1 spots per cell was quantified and normalized to that of starved siControl cells (mean  $\pm$  S.E.M., n = 3). 1500 cells were analyzed per condition. (d) HEK GFP-DFCP1 cells were treated as in c, stained for endogenous WIP12 and the number of WIP12 spots per cell was quantified (mean  $\pm$  S.E.M., n = 3). (e) HeLa cells were transfected with either control or HS1BP3 siRNA, starved or not for 2 h before fixation and staining for endogenous ATG16L1. The number of ATG16L1 spots per cell was quantified (mean  $\pm$  SEM, n = 3): \* $p$  < 0.05, ns: non-significant.

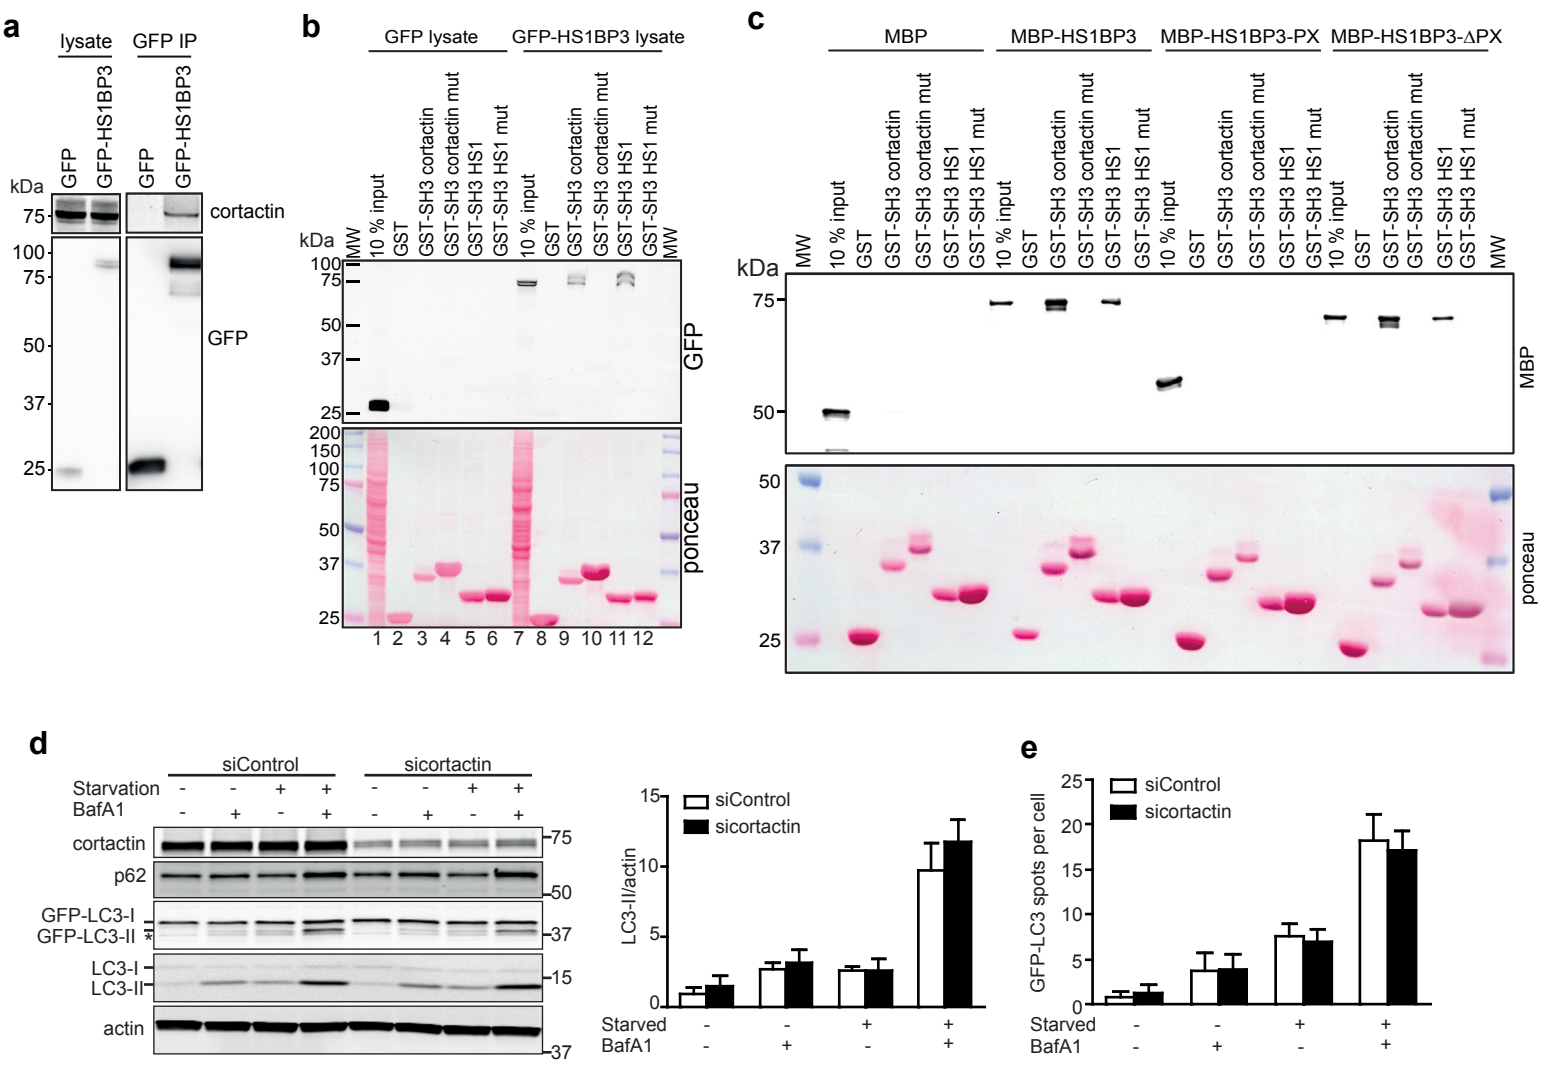

**Supplementary Figure 3: HS1BP3 interacts with cortactin independently of its role in autophagy**

(a) HeLa cell stably expressing tet-on GFP or GFP-HS1BP3 were induced by 50 ng/mL tetracycline for 16 h followed by immunoprecipitation using GFP trap. The resulting immunoprecipitates were separated by SDS-PAGE and analyzed by immunoblotting as indicated. (b) Lysates from HeLa GFP or GFP-HS1BP3 cells induced by 50 ng/mL tetracycline for 16 h were incubated with recombinant GST-tagged wild-type or mutated SH3 domain of cortactin or HS1, followed by pull-down using glutathione sepharose, separation by SDS-PAGE and immunoblotting against GFP. The membrane was stained with Ponceau S to visualize the GST-proteins and input lysate. (c) Recombinant MBP-tagged HS1BP3 full length or deletion mutants (HS1BP3-PX or HS1BP3-ΔPX) were incubated with recombinant GST-tagged wild-type or mutated SH3 domain of cortactin or HS1 followed by pull-down using glutathione beads, separation by SDS-PAGE and immunoblotting or Ponceau S staining as indicated. (d) HEK GFP-LC3 cells were transfected with siRNA against cortactin. 72 h later the cells were starved or not for 2 h in EBSS in the presence or absence of BafA1. Cell lysates were separated by SDS-PAGE and immunoblotted with the indicated antibodies. LC3-II/actin was quantified from immunoblots (mean  $\pm$  S.E.M., n = 3). (e) HEK GFP-LC3 cells treated as in d were fixed and analyzed by fluorescent microscopy and high-content image analysis. The number of GFP-LC3 spots per cell was quantified (mean  $\pm$  S.E.M., n = 3). Around 1500 cells were quantified per condition. Scale bars are 10  $\mu$ m.

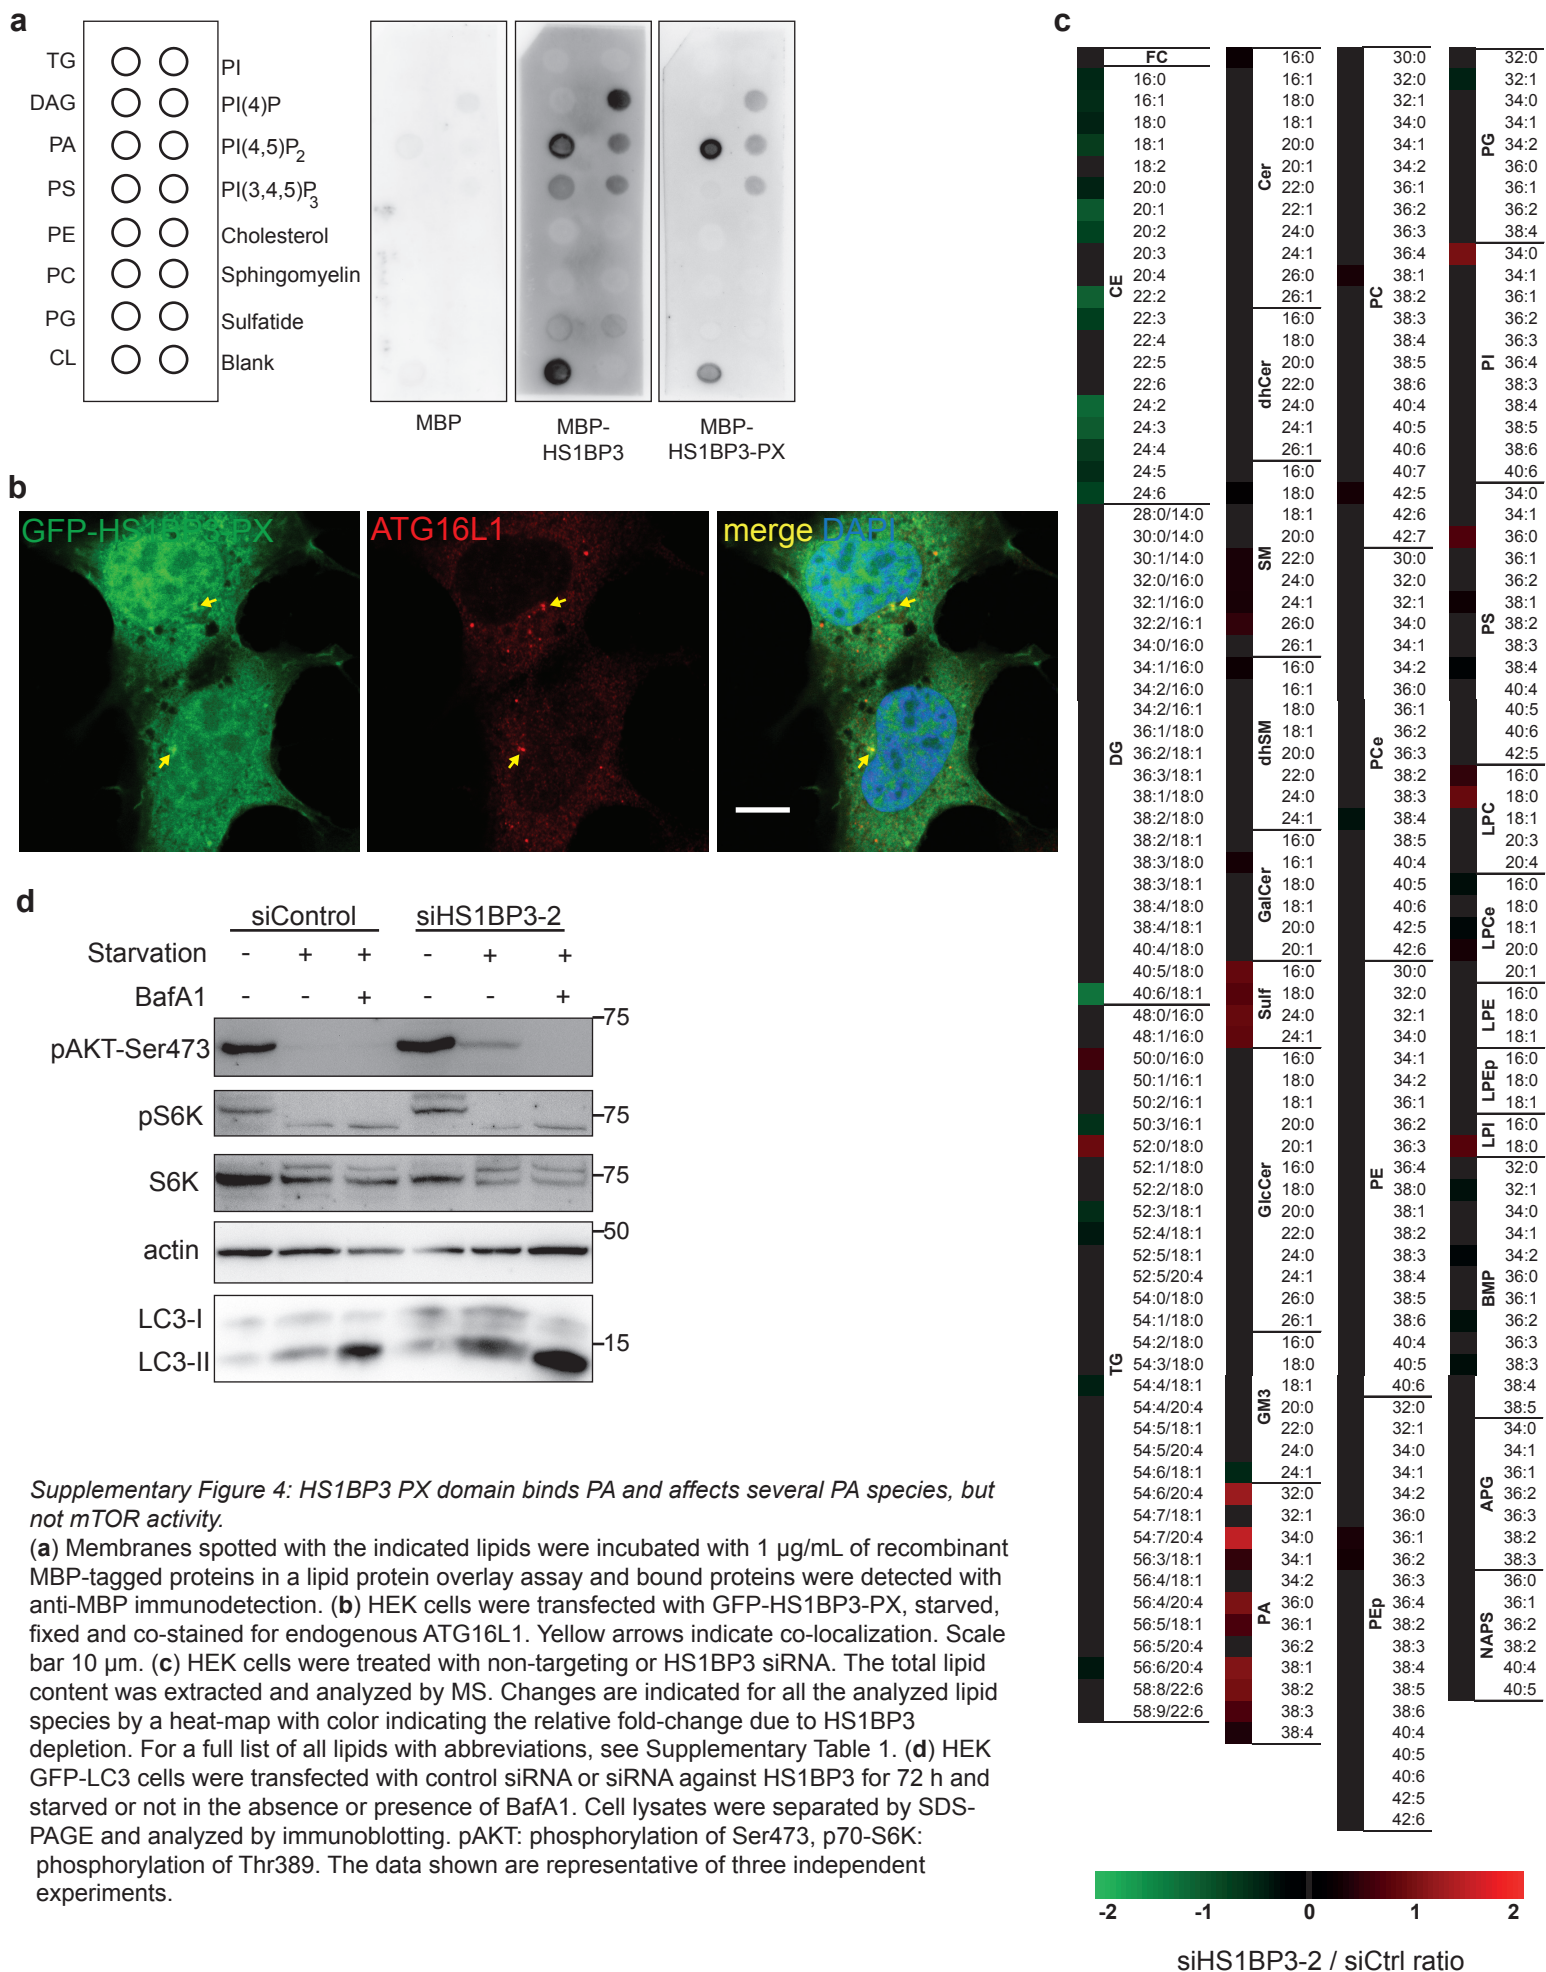

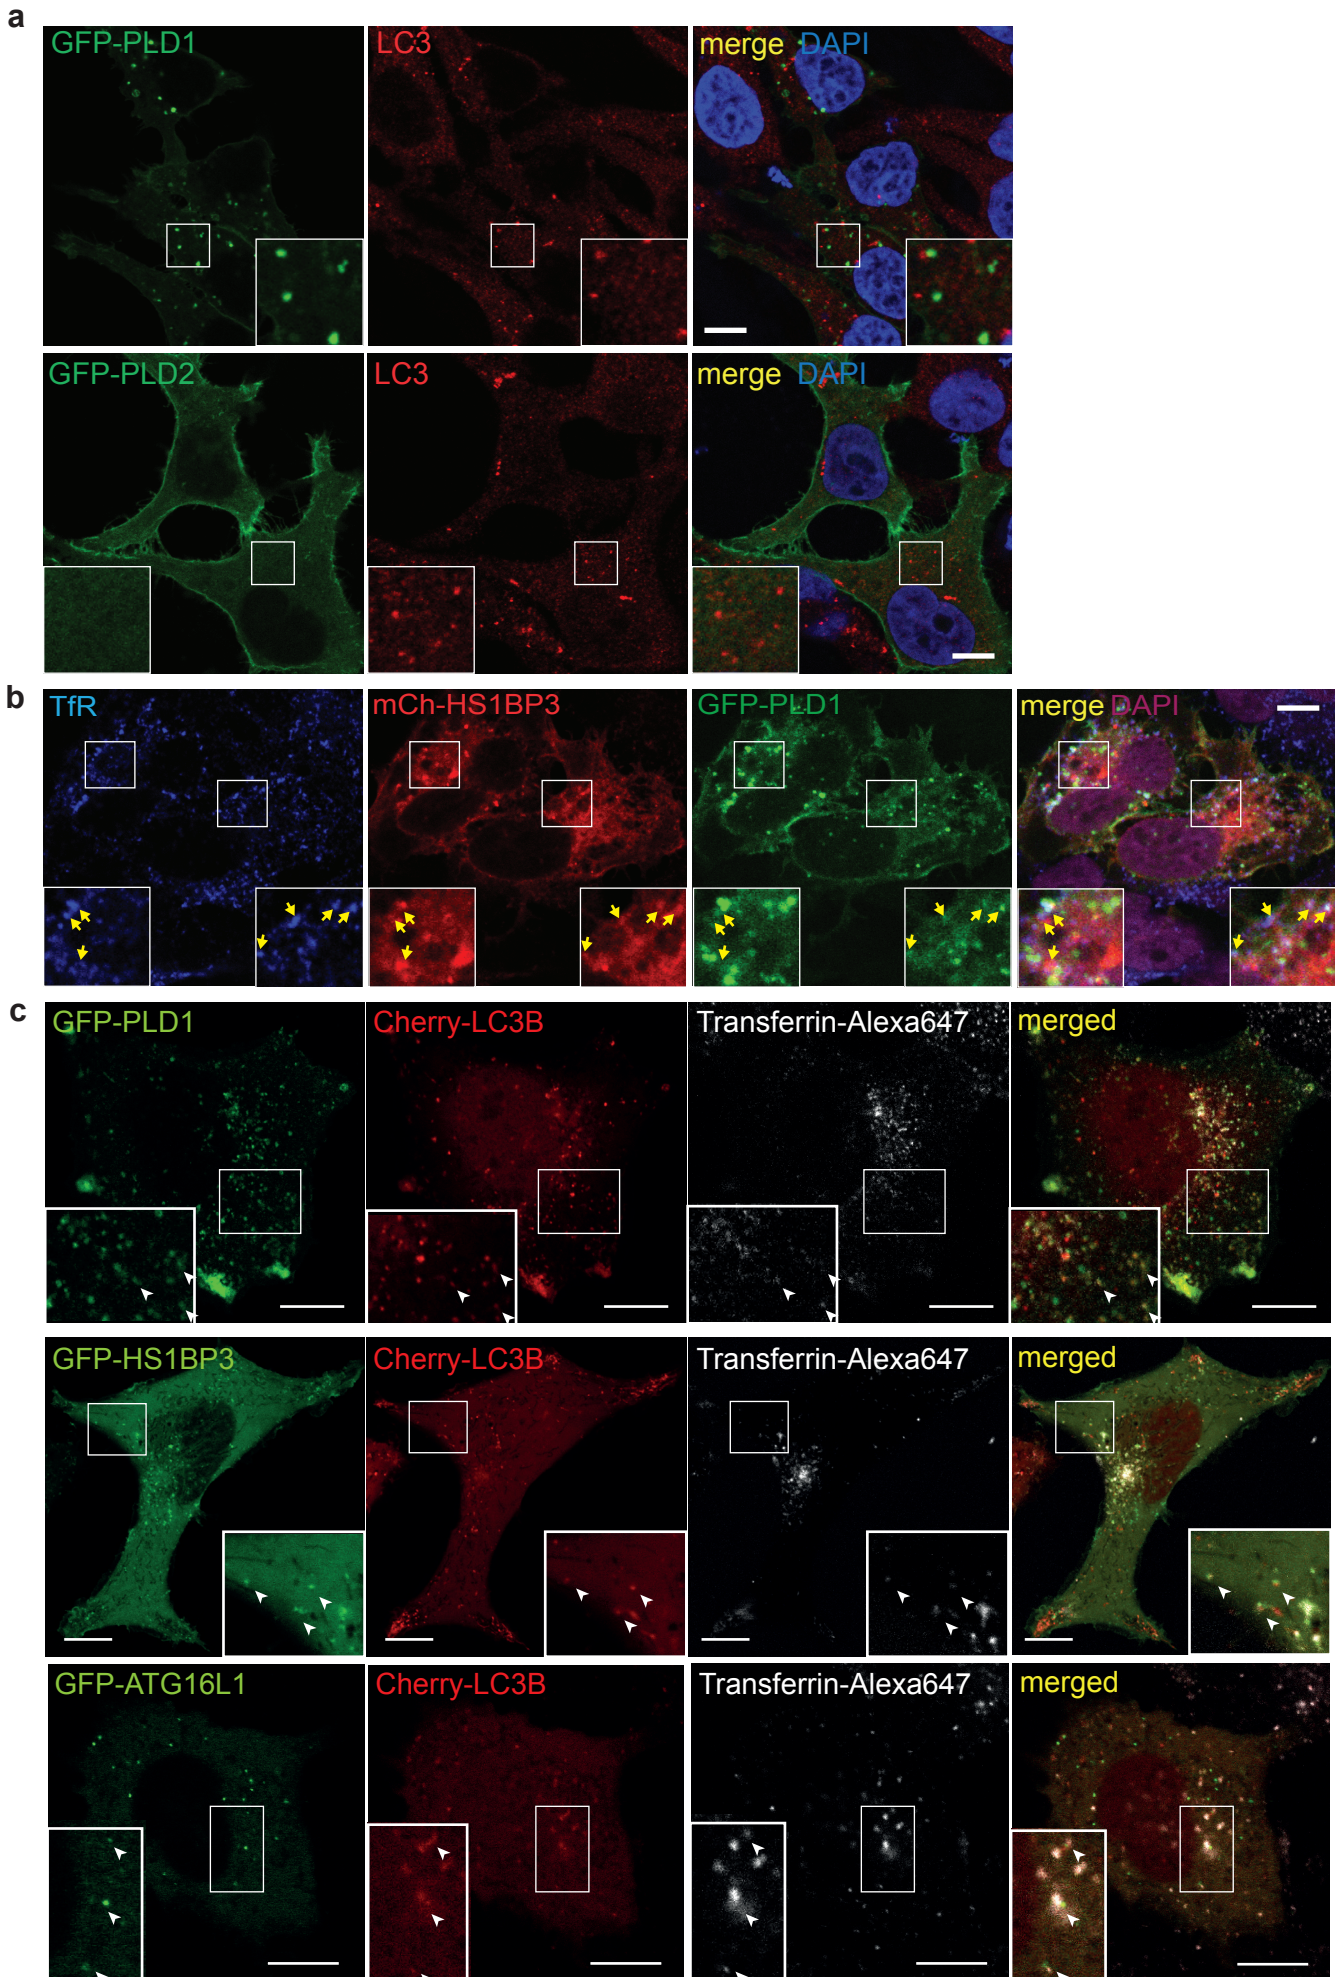

*Supplementary Figure 5: HS1BP3 affects PLD1 on autophagy precursor membranes*

(a) HEK cells were transfected to express GFP-tagged PLD1 or PLD2, starved and fixed then co-stained for endogenous LC3 and analyzed by confocal microscopy. (b) HEK cells were transfected to express GFP-tagged PLD1 and mCherry-HS1BP3, starved and fixed then co-stained for endogenous Transferrin receptor (TfR) and analyzed by confocal microscopy. All scale bars are 10  $\mu\text{m}$ . (c) HEK293A cells expressing the indicated constructs were starved for 1h in EBSS containing 5 $\mu\text{g}/\text{ml}$  of transferrin-Alexa Fluor 647 conjugate and imaged live with Zeiss LSM710 confocal microscope. Shown are still image frames from live scan. Arrowheads point to structures positive for all three proteins. All scale bars are 10 $\mu\text{m}$ .

**a**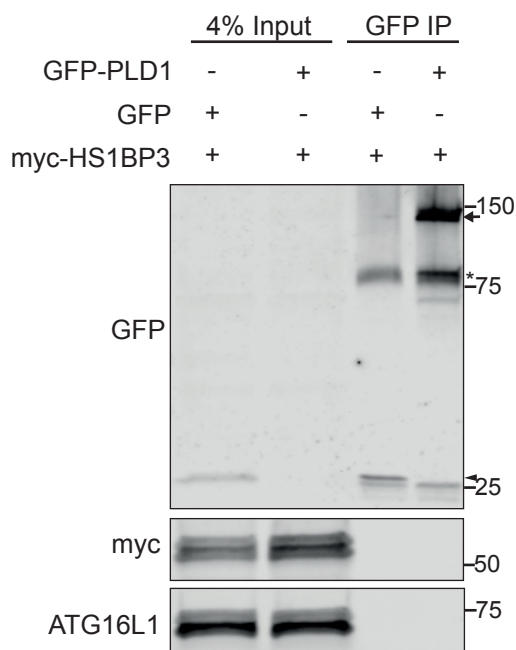**b**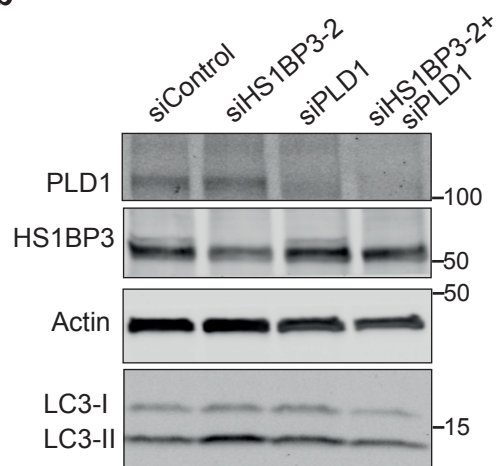

*Supplementary Figure 6: HS1BP3 affects PLD1 on autophagy precursor membranes, but not through protein-protein interactions*  
**(a)** Immunoprecipitation of GFP or GFP-PLD1 from HEK cells transfected with GFP and myc-HS1BP3 or GFP-PLD1 and myc-HS1BP3. An interaction between GFP-PLD1 and myc-HS1BP3 or ATG16L1 was investigated by western blotting. On the GFP blot the arrow indicates GFP-PLD1, arrowhead GFP and the star an unspecific band. **(b)** HEK cells transfected with the indicated siRNA were starved then lysed and analyzed by western blotting with the indicated antibodies. The cells were treated in parallel with the ones analyzed by microscopy in Figure 7a.

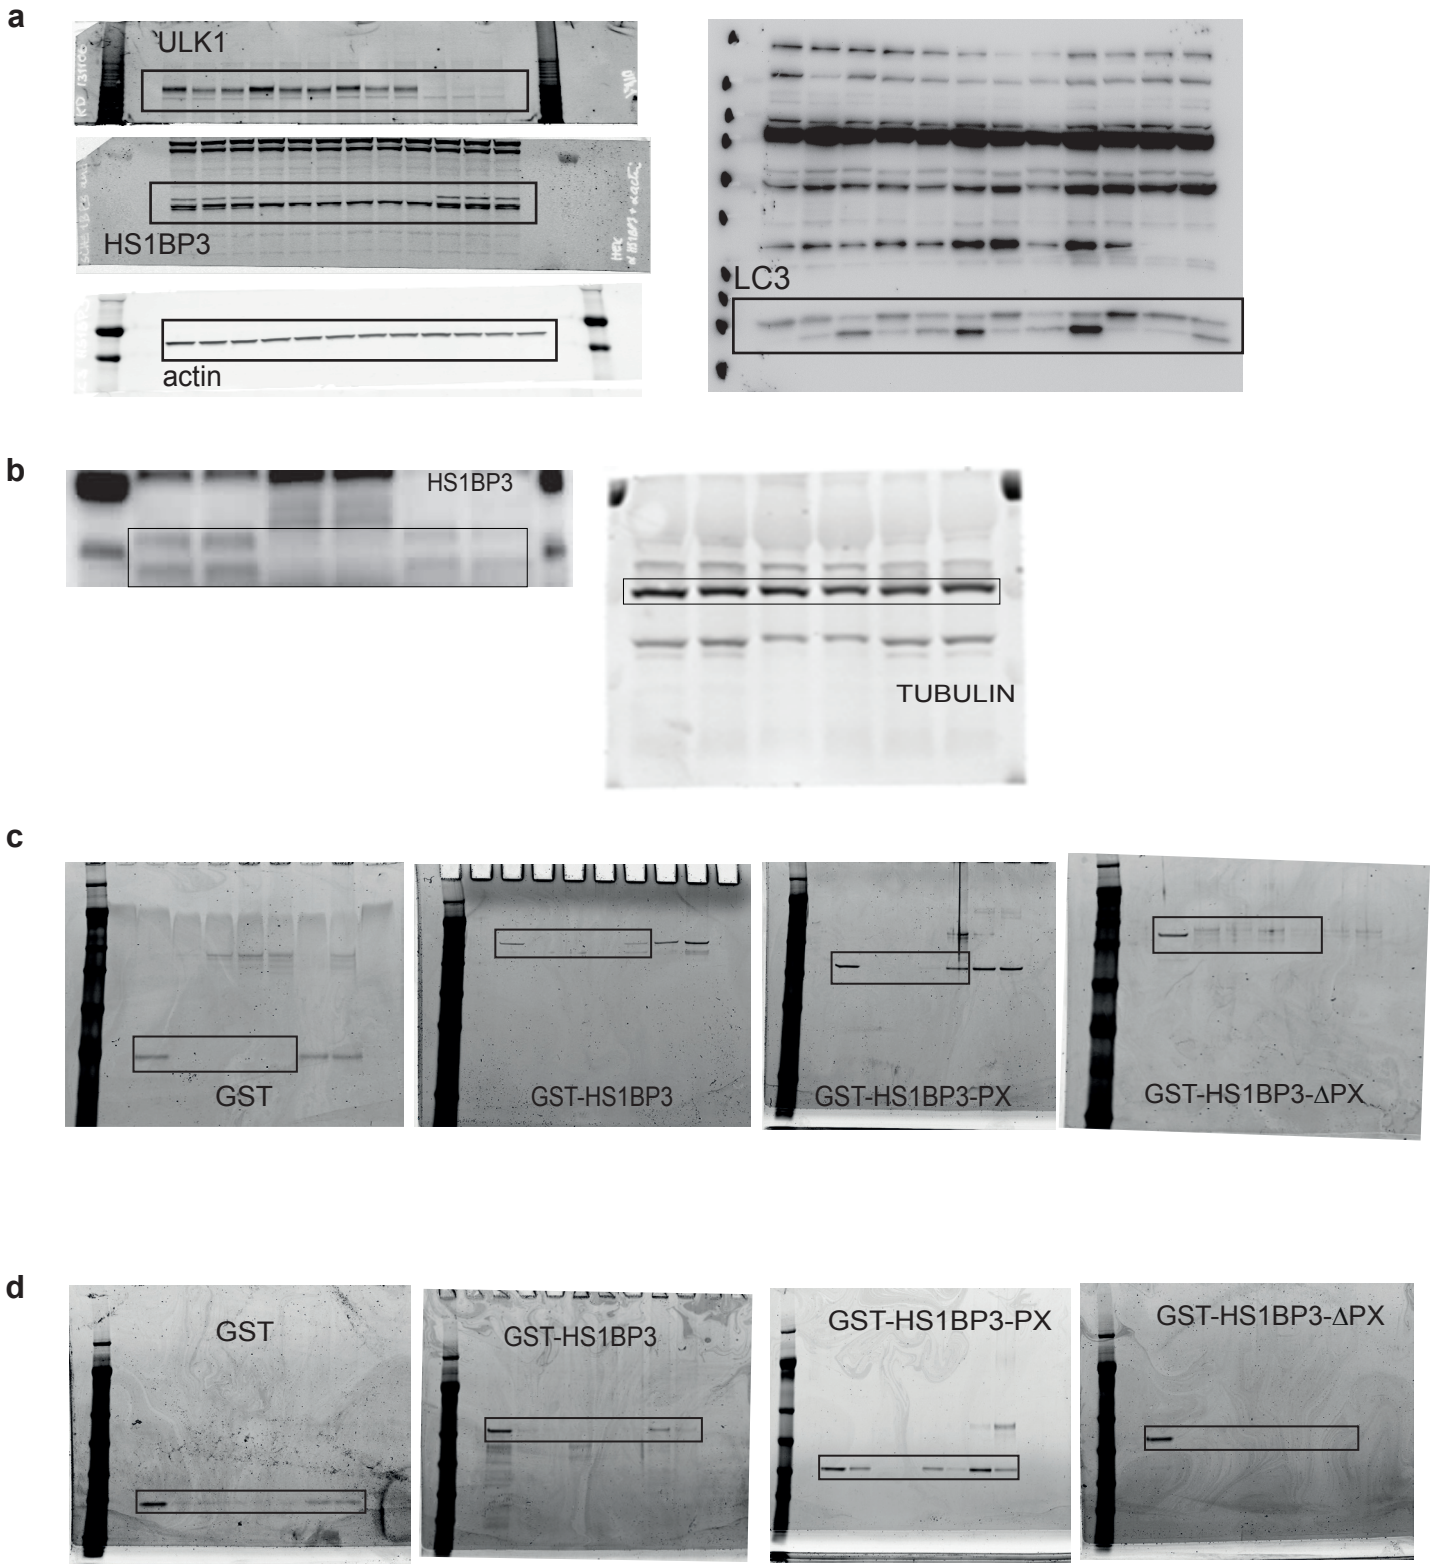

Supplementary Figure 7: Original scans used in the main text figures

(a) Blots from figure 1d

(b) Blots from figure 2c

(c) Gels from figure 4c

(d) Gels from figure 4d

Supplementary Table 1: Lipidomics data

| Lipid species |                                | Average normalized mol % |             | SEM normalized mol % |             | t-test |
|---------------|--------------------------------|--------------------------|-------------|----------------------|-------------|--------|
| Abbrev.       | full name                      | siCtrl                   | siHS1 BP3-2 | siCtrl               | siHS1 BP3-2 |        |
| FC            | Free cholesterol               | 1                        | 0.99        | 0.02                 | 0.03        | 0.857  |
| CE            | Cholesteryl esters             | 1                        | 0.80        | 0.03                 | 0.05        | 0.007  |
| DG            | Diglycerides                   | 1                        | 1.00        | 0.17                 | 0.17        | 0.995  |
| TG            | Triglycerides                  | 1                        | 1.10        | 0.04                 | 0.10        | 0.391  |
| Cer           | Ceramide                       | 1                        | 1.12        | 0.03                 | 0.06        | 0.112  |
| dhCer         | Dihydroceramide                | 1                        | 1.00        | 0.07                 | 0.07        | 0.967  |
| SM            | Sphingomyelin                  | 1                        | 1.16        | 0.04                 | 0.03        | 0.017  |
| dhSM          | Dihydrosphingomyelin           | 1                        | 1.15        | 0.03                 | 0.07        | 0.069  |
| GalCer        | Galactosylceramide             | 1                        | 1.08        | 0.03                 | 0.07        | 0.287  |
| Sulf          | Sulfatide                      | 1                        | 1.80        | 0.21                 | 0.14        | 0.010  |
| GlcCer        | Glucosylceramide               | 1                        | 1.07        | 0.03                 | 0.08        | 0.434  |
| LacCer        | Lactosylceramide               | 1                        | 0.94        | 0.03                 | 0.06        | 0.369  |
| GM3           | Monosialodihexosylganglioside  | 1                        | 0.96        | 0.09                 | 0.04        | 0.685  |
| PA            | Phosphatidic acid              | 1                        | 1.95        | 0.14                 | 0.26        | 0.010  |
| PC            | Phosphatidylcholine            | 1                        | 1.08        | 0.09                 | 0.08        | 0.490  |
| PCe           | Phosphatidylcholine ether      | 1                        | 0.88        | 0.07                 | 0.05        | 0.219  |
| PE            | Phosphatidylethanolamine       | 1                        | 1.05        | 0.07                 | 0.07        | 0.583  |
| PEp           | Plasmalogen PE                 | 1                        | 1.11        | 0.06                 | 0.04        | 0.154  |
| PG            | Phosphatidylglycerol           | 1                        | 0.90        | 0.03                 | 0.08        | 0.249  |
| PI            | Phosphatidylinositol           | 1                        | 1.06        | 0.07                 | 0.07        | 0.523  |
| PS            | Phosphatidylserine             | 1                        | 1.07        | 0.04                 | 0.07        | 0.401  |
| LPC           | Lysophosphatidylcholine        | 1                        | 1.34        | 0.04                 | 0.06        | 0.001  |
| LPCe          | Lysophosphatidylcholine ether  | 1                        | 1.00        | 0.05                 | 0.04        | 0.976  |
| LPE           | Lysophosphatidylethanolamine   | 1                        | 1.09        | 0.03                 | 0.11        | 0.456  |
| LPEp          | Plasmalogen LPE                | 1                        | 1.23        | 0.06                 | 0.17        | 0.225  |
| LPI           | Lysophosphatidylinositol       | 1                        | 1.29        | 0.04                 | 0.07        | 0.004  |
| BMP           | Bis(monoacylglycero)phosphates | 1                        | 0.85        | 0.01                 | 0.04        | 0.005  |
| APG           | Acylphosphatidylglycerol       | 1                        | 0.92        | 0.08                 | 0.07        | 0.430  |
| NAPS          | N-acylphosphatidylserines      | 1                        | 1.17        | 0.04                 | 0.15        | 0.290  |



Supplementary Table 2: Plasmids used in this study.

| Plasmid                     | Primers                                                                         | Cloning                                                                           |
|-----------------------------|---------------------------------------------------------------------------------|-----------------------------------------------------------------------------------|
| pEGFP-HS1BP3                | 5'-ATAGAATTCATGCAGTCCCCGGCGGTGCTC-3'<br>5'-ATAGTCGACTCAGAAGAGGCTGGGGGCGG-3'     | Into pEGFP.C2 using EcoRI and Sall restriction sites                              |
| pENTR-HS1BP3                | 5'-ATAGTCGACATGCAGTCCCCGGCGGTGCTC-3'<br>5'-ATAGCGGCCGCTCAGAAGAGACTGGGGGCGG-3'   | Amplification from cDNA library, into pENTR using Sall and NotI restriction sites |
| pENTR-HS1BP3-PX             | 5'-ATAGTCGACATGCAGTCCCCGGCGGTGCTC-3'<br>5'ATAGCGGCCGCTCAGGATCTGGTACCTAAGAATC-3' | Amplification from pENTR-HS1BP3, into pENTR using Sall and NotI restriction sites |
| pENTR-HS1BP3-ΔPX            | 5'-ATAGTCGACGCTGCAGGGCTCACCAGCAG-3'<br>5'-ATAGCGGCCGCTCAGAAGAGACTGGGGGCGG-3',   | Amplification from pENTR-HS1BP3, into pENTR using Sall and NotI restriction sites |
| pTH1-HS1BP3 (MBP tag)       | -                                                                               | Gateway LR cloning from pENTR-HS1BP3                                              |
| pTH1-HS1BP3-PX (MBP tag)    | -                                                                               | Gateway LR cloning from pENTR HS1BP3-PX                                           |
| pTH1-HS1BP3-ΔPX (MBP tag)   | -                                                                               | Gateway LR cloning from pENTR HS1BP3-ΔPX                                          |
| pDEST-mCherry-HS1BP3        | -                                                                               | Gateway LR cloning from pENTR-HS1BP3                                              |
| pTH1-2xFYVE-Hrs (MBP tag)   | -                                                                               | Gateway LR cloning from pENTR-2xFYVE-Hrs                                          |
| pGEX-2xFYVE-Hrs             | -                                                                               | <sup>1</sup>                                                                      |
| pCI2Flag Cortactin          | -                                                                               | Kindly provided by J. K. Burkhardt                                                |
| pGEX kG hHS1 SH3            | -                                                                               | Kindly provided by J. K. Burkhardt                                                |
| pGEX kG hHS1 SH3 W->Y       | -                                                                               | Kindly provided by J. K. Burkhardt                                                |
| pGEX kG hcortactin SH3      | -                                                                               | Kindly provided by J. K. Burkhardt                                                |
| pGEX kG hcortactin SH3 W->Y | -                                                                               | Kindly provided by J. K. Burkhardt                                                |
| pCGN-HA-hPLD1b              | -                                                                               | Kindly provided by M. Frohman <sup>2</sup>                                        |
| pEGFP-C1-hPLD1b             | -                                                                               | Kindly provided by M. Frohman <sup>2</sup>                                        |
| pEGFP-C1-mPLD2              | -                                                                               | Kindly provided by M. Frohman <sup>2</sup>                                        |
| pDEST15-LC3B                | -                                                                               | <sup>3</sup>                                                                      |

|                                       |                                                                          |                                         |
|---------------------------------------|--------------------------------------------------------------------------|-----------------------------------------|
| (GST tag)                             |                                                                          |                                         |
| pDEST15-GABARAP (GST tag)             | -                                                                        | 3                                       |
| pDEST15-HS1BP3-PX (GST tag)           | -                                                                        | Gateway LR cloning from pENTR HS1BP3-PX |
| pDEST53-p62 (in vitro translation)    | -                                                                        | 3                                       |
| pDEST53-HS1BP3 (in vitro translation) | -                                                                        | Gateway LR cloning from pENTR-HS1BP3    |
| pSP64 Poly (A)-Hs-Hs1bp3              | 5' taaaAAGCTTATGCAGTCCCCGGCGGTG 3'<br>5' taaaGAGCTCTCAGAAGAGGCTGGGGGC 3' | Expression of HS1BP3 in zebrafish       |
| pEGFP-C2 DFCP1                        | -                                                                        | Kindly provided by Nicholas Ktistakis   |
| pEGFP – p62                           | -                                                                        | -                                       |
| pDEST-EGFP-LC3B                       | -                                                                        | -                                       |
| pEGFP(C1)-Atg16L                      | -                                                                        | -                                       |
| pEGFP-Atg14L                          | -                                                                        | Kindly provided by Tamotsu Yoshimori    |

## Supplementary references

1. Gillooly, D.J. *et al.* Localization of phosphatidylinositol 3-phosphate in yeast and mammalian cells. *The EMBO journal* **19**, 4577-4588 (2000).
2. Hammond, S.M. *et al.* Human ADP-ribosylation factor-activated phosphatidylcholine-specific phospholipase D defines a new and highly conserved gene family. *J Biol Chem* **270**, 29640-29643 (1995).
3. Pankiv, S. *et al.* p62/SQSTM1 binds directly to Atg8/LC3 to facilitate degradation of ubiquitinated protein aggregates by autophagy. *J.Biol.Chem.* **282**, 24131-24145 (2007).
